# Supplementary figures and images for: Upregulation of the MYB2 Transcription Factor is Associated with Increased Accumulation of Anthocyanin in the Leaves of Dendrobium bigibbum
Source: MDPI journal article supplement (doi:10.3390/ijms21165653), 2020-08-06

**Figure S1**

**RB016A-WT**

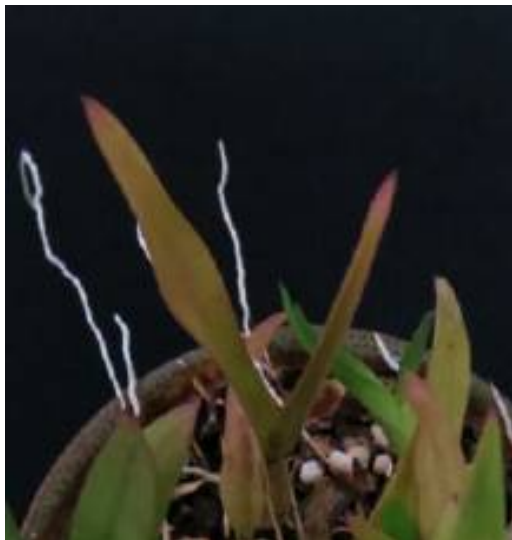

**RB016A-S7**

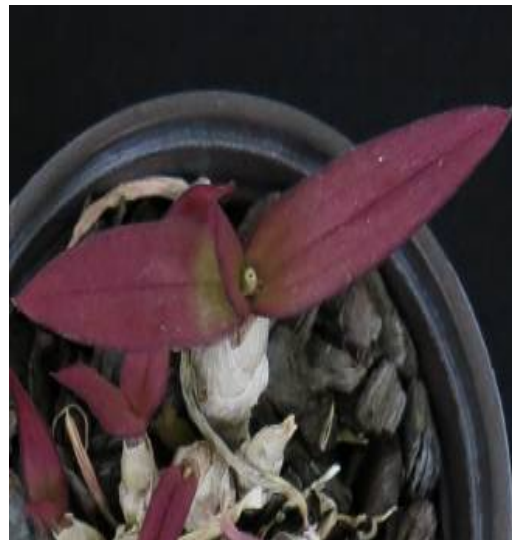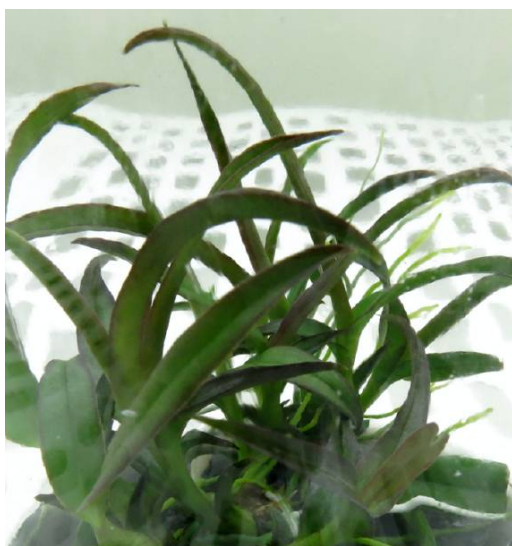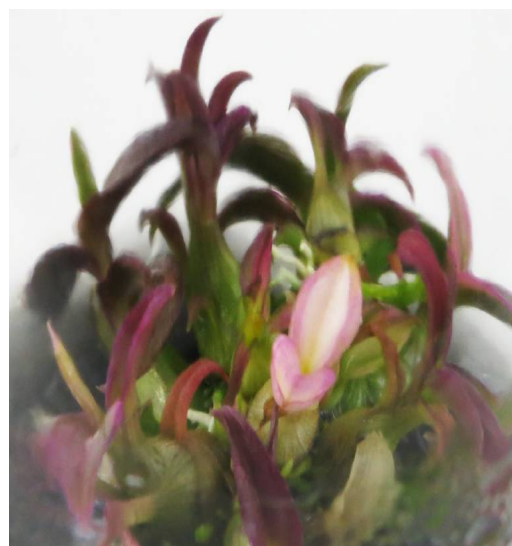

GO classification

Figure S2

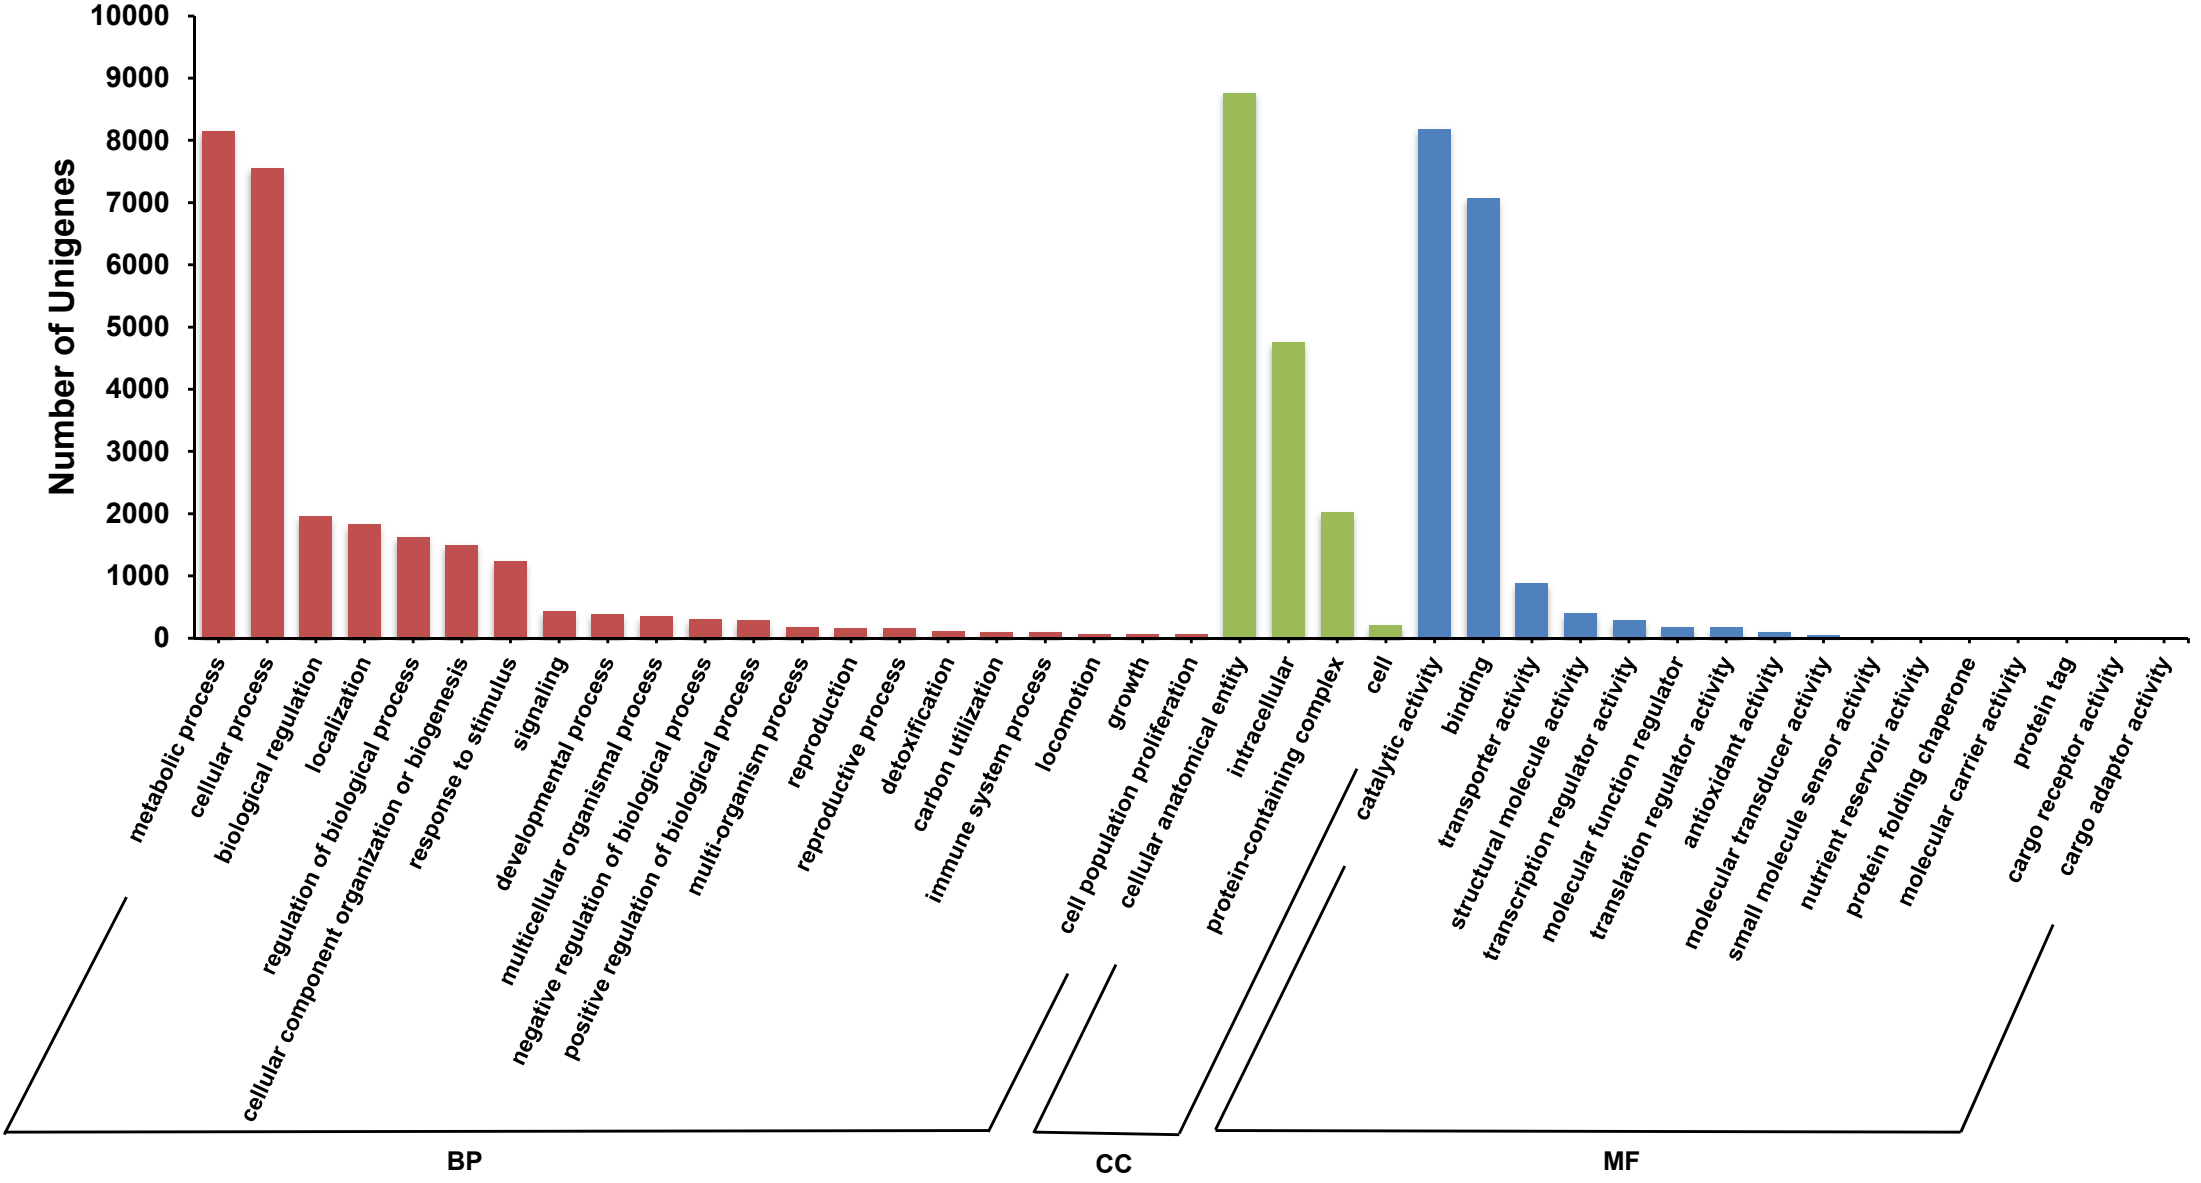

**Figure S3**

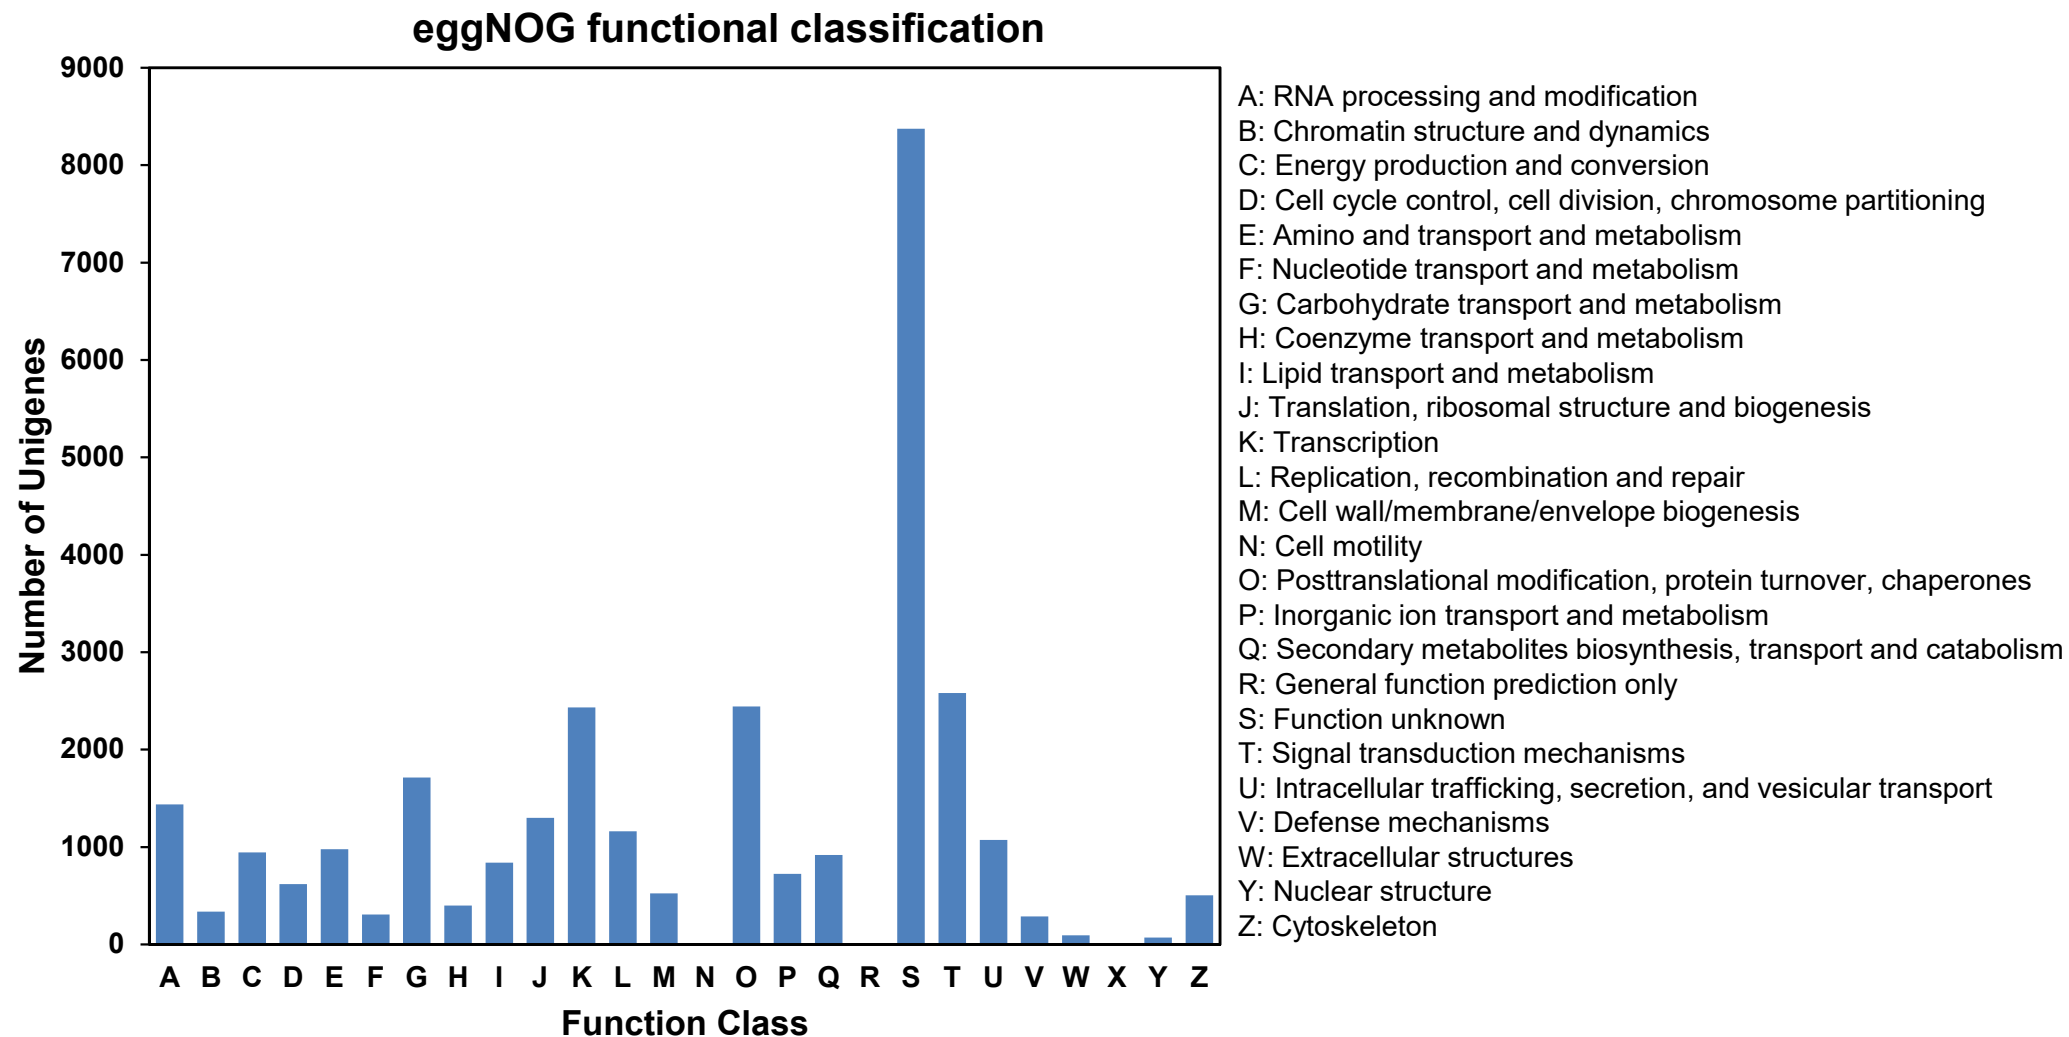

Figure S4

## KEGG Classification

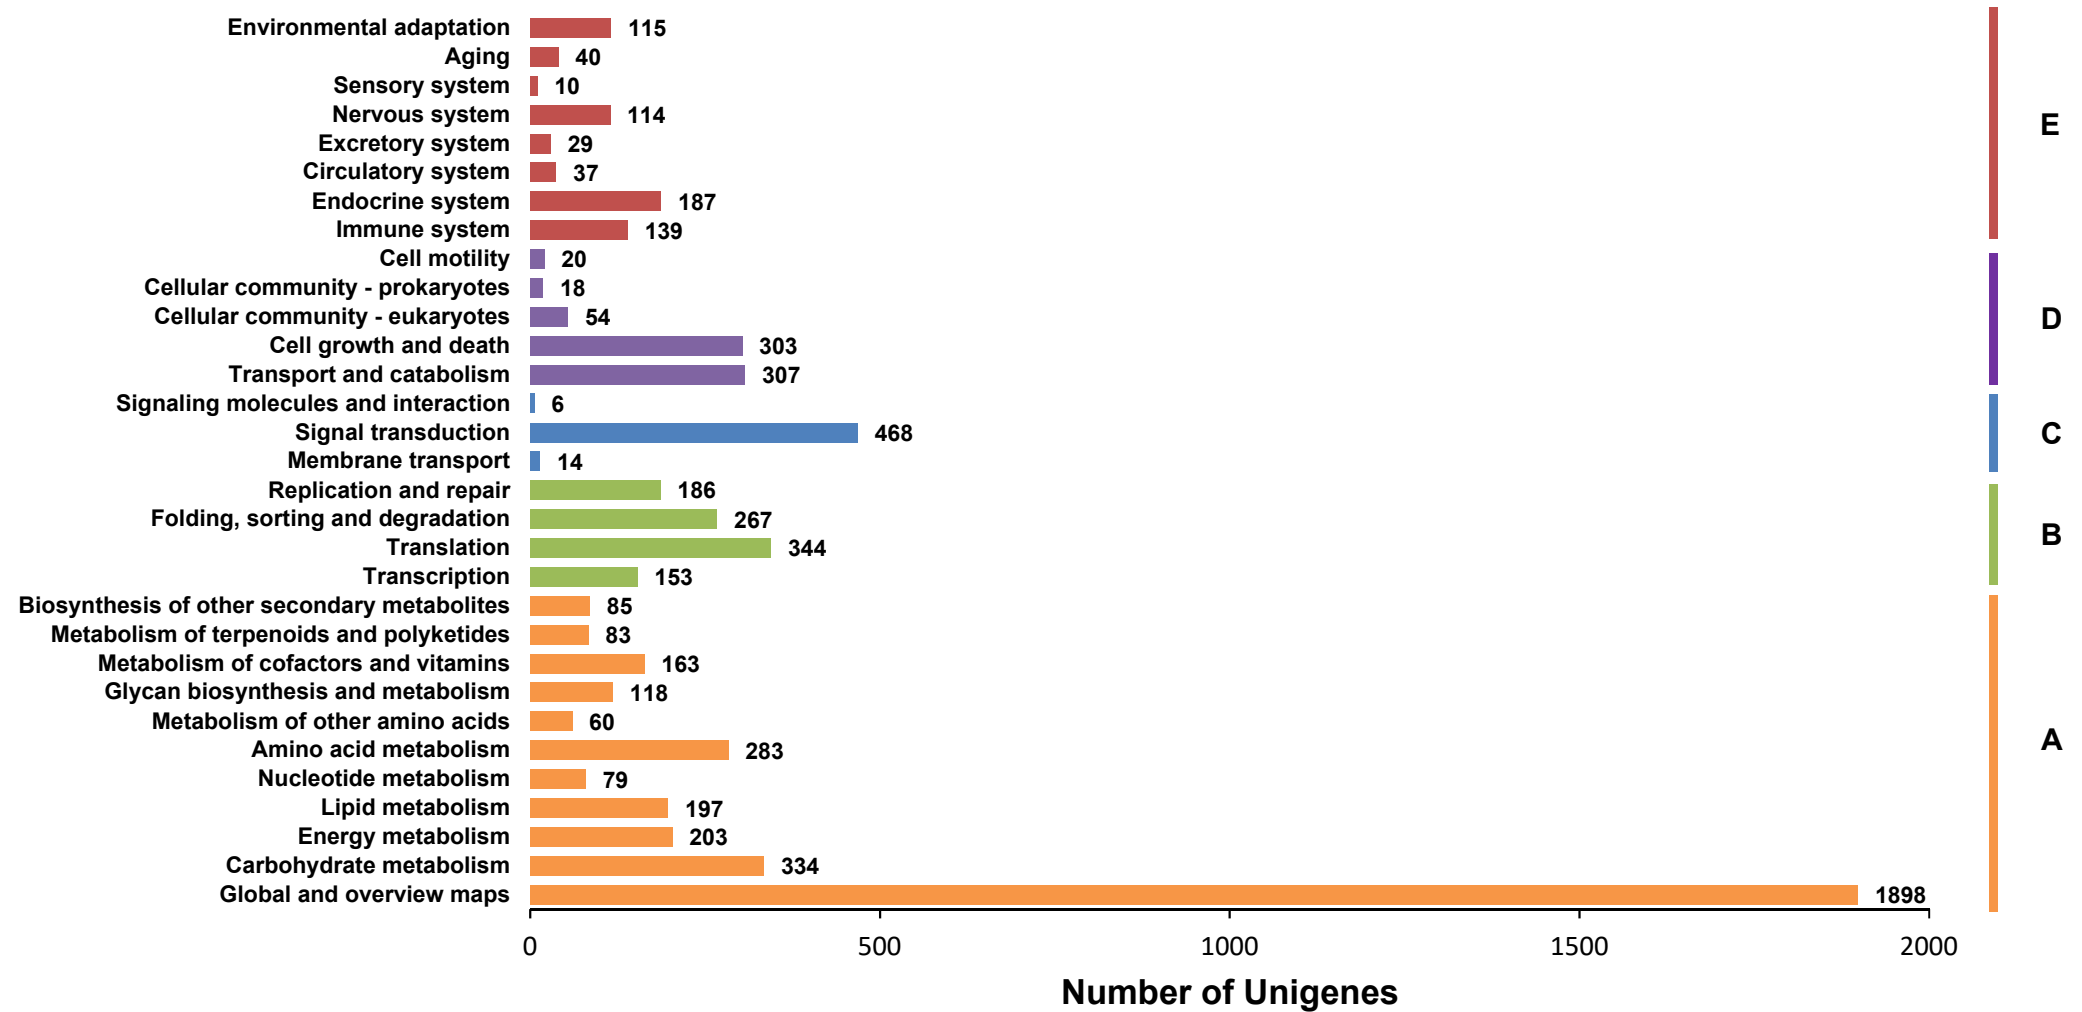

Supplement: s1 [file s1]
